# Supplementary material
Source: Springer Nature journal article supplement (https://www.springermedizin.de/resource/supplementary/12987_2013_79_MOESM1_ESM.pdf/9680284)
Supplement: MOESM1 [file 9680284]

**Table S1. TNF $\alpha$  and IFN $\gamma$ -induced modulation of gene expression profile of cultured human brain endothelium**

| CATEGORY     | TERM                                 | COUNT | PValue      | FOLD ENR.<br>BONFERRONI | BENJAMINI   |
|--------------|--------------------------------------|-------|-------------|-------------------------|-------------|
| KEGG_PATHWAY | HLA/CAM                              | 20    | 1.91E-08    | 2.31E-06                | 5.79E-07    |
| KEGG_PATHWAY | Cytokine/Chemokine activity          | 28    | 2.80E-08    | 3.375373382             | 3.38E-06    |
| KEGG_PATHWAY | cytokine-induced signalling pathways | 16    | 4.34E-07    | 5.26E-05                | 4.78E-06    |
| KEGG_PATHWAY | Complement and coagulation cascades  | 8     | 0.005613018 | 0.493934113             | 0.041674727 |
| KEGG_PATHWAY | Apoptosis                            | 9     | 0.005713793 | 0.500102261             | 0.039964864 |

continue Table S1

| Chemokines     |         |                           |             |
|----------------|---------|---------------------------|-------------|
| ACCESSION      | SYMBOL  | FOLD-CHANGE OR REGULATION | ADJ.P.VAL   |
| NM_001040138.1 | CKLF    | -1.560                    | 0.000035    |
| NM_001040139.1 | CKLF    | -1.445                    | 0.000385    |
| NM_000609.4    | CXCL12  | -                         | 1.77E-05    |
| NM_001338.3    | CXADR   | -                         | 7.07E-05    |
| NM_145898.1    | CCL23   | -                         | 0.018426597 |
| NM_199168.2    | CXCL12  | -                         | 2.97E-06    |
| NM_001565.2    | CXCL10  | 167.240                   | 3.42E-09    |
| NM_002036.2    | DARC    | 4.855                     | 1.27E-05    |
| NM_002089.3    | CXCL2   | 3.576                     | 1.64E-07    |
| NM_002982.3    | CCL2    | 38.559                    | 2.00E-07    |
| NM_002985.2    | CCL5    | 35.166                    | 2.84E-11    |
| NM_002996.3    | CX3CL1  | 25.551                    | 3.90E-09    |
| NM_022059.1    | CXCL16  | 3.175                     | 5.92E-08    |
| NM_001511.1    | CXCL1   | +                         | 4.98E-06    |
| NM_002416.1    | CXCL9   | +                         | 9.19E-12    |
| NM_002993.2    | CXCL6   | +                         | 5.27E-07    |
| NM_002994.3    | CXCL5   | +                         | 8.82E-05    |
| NM_004591.1    | CCL20   | +                         | 2.30E-08    |
| NM_005623.2    | CCL8    | +                         | 1.02E-11    |
| Interleukins   |         |                           |             |
| ACCESSION      | SYMBOL  | FOLD-CHANGE OR REGULATION | ADJ.P.VAL   |
| NM_138284.1    | IL17D   | -2.571                    | 1.15E-05    |
| NM_001560.2    | IL13RA1 | -2.185                    | 1.79E-06    |
| NM_004512.3    | IL11RA  | -1.874                    | 6.35E-05    |
| NM_000572.2    | IL10    | -1.299                    | 0.008634538 |
| NM_004512.3    | IL11RA  | -1.223                    | 0.013733677 |
| NM_000565.2    | IL6R    | -1.200                    | 0.025617916 |
| NM_000565.2    | IL6R    | -1.129                    | 0.074339811 |
| NM_152456.1    | IL34    | 1.224                     | 0.03412512  |
| NM_173843.1    | IL1RN   | 1.251                     | 0.016566058 |

|                |         |        |             |
|----------------|---------|--------|-------------|
| NM_004843.2    | IL2/KA  | 1.550  | 0.0023411/4 |
| NM_000882.2    | IL12A   | 1.375  | 0.000232668 |
| NM_153701.1    | IL12RB1 | 1.391  | 0.000282523 |
| NM_000585.2    | IL15    | 1.399  | 0.001212931 |
| NM_153701.1    | IL12RB1 | 1.562  | 2.60E-05    |
| NM_002185.2    | IL7R    | 1.592  | 3.60E-05    |
| NM_000575.3    | IL1A    | 1.665  | 1.38E-05    |
| NM_002183.2    | IL3RA   | 1.703  | 8.68E-05    |
| NM_002189.2    | IL15RA  | 1.904  | 2.33E-05    |
| NM_003855.2    | IL18R1  | 2.087  | 0.000237793 |
| NM_003856.2    | IL1RL1  | 2.340  | 7.18E-05    |
| NM_173042.2    | IL18BP  | 2.583  | 4.27E-07    |
| NM_000600.1    | IL6     | 3.225  | 3.61E-07    |
| NM_002189.2    | IL15RA  | 3.575  | 1.91E-08    |
| NM_003856.2    | IL1RL1  | 3.928  | 1.36E-05    |
| NM_172374.1    | IL4I1   | 9.878  | 3.42E-09    |
| NM_173042.2    | IL18BP  | 19.573 | 7.35E-10    |
| NM_001012636.1 | IL32    | 23.343 | 1.05E-10    |
| NM_001012633.1 | IL32    | 24.945 | 5.18E-10    |
| NM_000584.2    | IL8     | 56.262 | 3.62E-09    |

**Cell adhesion molecules**

| <b>ACCESSION</b> | <b>SYMBOL</b> | <b>FOLD-CHANGE OR REGULATION</b> | <b>ADJ.P.VAL</b> |
|------------------|---------------|----------------------------------|------------------|
| NM_000442.3      | PECAM1        | -1.706                           | 0.021712033      |
| NM_001099786.1   | ICAM2         | -1.537                           | 0.002696545      |
| NM_002162.2      | ICAM3         | -1.319                           | 0.003817802      |
| NM_032801.3      | JAM3          | -1.577                           | 0.000226073      |
| NM_138961.1      | ESAM          | -2.639                           | 0.000525608      |
| NM_001024912.1   | CEACAM1       | 5.388                            | 3.22E-08         |
| NM_001024912.1   | CEACAM1       | 6.520                            | 5.56E-08         |
| NM_001078.2      | VCAM1         | 52.031                           | 5.93E-09         |
| NM_005010.3      | NRCAM         | 1.961                            | 3.19E-06         |
| NM_005010.3      | NRCAM         | 2.310                            | 3.55E-06         |
| NM_175573.1      | *ADRM1        | 1.490                            | 0.000372749      |
| NM_000201.1      | ICAM1         | +                                | 0.000178645      |
| NM_001712.3      | CEACAM1       | +                                | 9.98E-08         |
| NM_001627.2      | ALCAM         | N                                | 0.822056005      |
| NM_006500.2      | MCAM          | N                                | 0.121193353      |
| NM_024003.1      | L1CAM         | N                                | 0.111091182      |
| NM_016174.3      | CERCAM        | N                                | 0.603205212      |
| NM_021189.2      | CADM3         | N                                | 0.678687481      |
| NM_175573.1      | *ADRM1        | N                                | 0.097286675      |

- Indicates downregulation below detection levels in cytokine-treated cells, + indicates upregulation from below detection levels in control cells, N indicates no changes between control and cytokine-treated cells and \* indicates transcript showing different results with different probes.
